# Supplementary material for: Echocardiography and MALDI-TOF Identification of Myosin-Binding Protein C3 A74T Gene Mutations Involved Healthy and Mutated Bengal Cats
Source: MDPI journal article supplement (doi:10.3390/ani12141782), 2022-07-12
Supplement: s1 [file s1]

## Supplementary material file 1

### Availability of data and materials

The datasets generated and/or analysed during the current study are available in the NCBI database repository (myosin binding protein C3 in domestic cat; gene ID: 101094698), <https://www.ncbi.nlm.nih.gov/gene/101094698>.

### DNA Sequencing

Myosin Binding Protein C3: A31P and A74T

```
...|...| ...|...| ...|...| ...|...| ...|...|
      10      20      30      40      50
180013-BA- CGACAGCTCT GCTGTGTTTC AGGCCGAGAC AGAGCGGTCA GGAGTAAAGG

...|...| ...|...| ...|...| ...|...| ...|...|
      60      70      80      90     100
180013-BA- TCGCTGGCA GCGGGGGGGC AGTGACATCA GCGCCAGTGA CAAGTATGGC

...|...| ...|...| ...|...| ...|...| ...|...|
     110     120     130     140     150
180013-BA- CTAGCAGCCG AGGGCACGAG GCACACTCTG ACAGTGCGGG ACGTGGGCCC

...|...| ...|...| ...|...| ...|...| ...|...|
     160     170     180     190     200
180013-BA- CGCCGACCAG GGACCCTACG CAGTCATCGC TGGCTCCTCC AAGGTCAAGT

...|
180013-BA- TTGAA
```
